# Supplementary material for: Enhancement of Aggregation-Induced Emission by Introducing Multiple o-Carborane Substitutions into Triphenylamine
Source: PubMed Central journal article supplement (PMC6150215; doi:10.3390/molecules22112009), 2017-11-19
Supplement: molecules-22-02009-s001.pdf [file molecules-22-02009-s001.pdf]

# Supplementary Materials: Enhancement of Aggregation-Induced Emission Property by Introducing Multiple Substitutions of *o*-Carborane into Triphenylamine

Kenta Nishino, Kyoya Uemura, Masayuki Gon, Kazuo Tanaka\*, and Yoshiki Chujo\*

*Department of Polymer Chemistry, Graduate School of Engineering, Kyoto University, Katsura, Nishikyo-ku, Kyoto 615-8510, Japan*

E-mail: tanaka@poly.synchem.kyoto-u.ac.jp; chujo@poly.synchem.kyoto-u.ac.jp

## Experimental section

### General

<sup>1</sup>H, <sup>13</sup>C, and <sup>11</sup>B NMR spectra were recorded on a JEOL JNM-EX400 instrument at 400, 100, and 128 MHz, respectively. The <sup>1</sup>H and <sup>13</sup>C chemical shift values were expressed relative to Me<sub>4</sub>Si as an internal standard. The <sup>11</sup>B chemical shift values were expressed relative to BF<sub>3</sub>·Et<sub>2</sub>O as an external standard. High-resolution mass spectra (HRMS) were obtained on a Thermo Fisher Scientific EXACTIVE spectrometer for atmospheric pressure chemical ionization (APCI). Analytical thin-layer chromatography (TLC) was performed with silica gel 60 Merck F254 plates. Column chromatography was performed with Wakogel C-300 silica gel. UV-vis absorption spectra were obtained on a SHIMADZU UV3600 spectrophotometer. Photoluminescence (PL) spectra were obtained on a Horiba FluoroMax-4 luminescence spectrometer. Absolute PL quantum efficiencies ( $\Phi_{\text{PL}}$ ) were determined using a Horiba FL-3018 Integrating Sphere. **2a** and **3a** were prepared according to the previous literature.<sup>1</sup>

### Synthetic procedures

**1B.** Decaborane (291 mg, 2.39 mmol) was dissolved in CH<sub>3</sub>CN (2 mL) at room temperature under Ar atmosphere. The mixture was stirred for 1 h at 50 °C, and then, dry toluene (20 mL), AgNO<sub>3</sub> (25.8 mg, 0.152 mmol) and 4-ethynyltriphenylamine (533 mg, 1.98 mmol) were added. The mixture was refluxed for 2 d. After cooling to room temperature, the solvent was evaporated, and the residue was subjected to silica gel column chromatography with hexane/CH<sub>2</sub>Cl<sub>2</sub> (v/v = 9/1) as an eluent. Recrystallization from chloroform and methanol (good and poor solvent, respectively) to give **1B** as a yellow solid (54.4 mg, 6%). <sup>1</sup>H NMR (400 MHz, CDCl<sub>3</sub>):  $\delta$  (ppm) 7.29 (s, 6H, Ar-H), 7.10 (1H, s, Ar-H), 6.90 (d, 2H, *J* = 9.0, Ar-H), 3.99 (s, 1H, carborane\_C-H), 3.8–1.80 (br, 10H, B-H). <sup>13</sup>C NMR (100 MHz, CDCl<sub>3</sub>):  $\delta$  (ppm) 149.4, 146.8, 129.5, 128.7, 125.5, 125.5, 124.2, 120.9, 61.0, 29.7. <sup>11</sup>B NMR (128 MHz, CDCl<sub>3</sub>):  $\delta$  (ppm) -1.5, -2.6, -4.5, -5.4, -8.7, -9.9, -11.3, -12.2, -13.4. HRMS (APCI<sup>+</sup>): Calcd. for C<sub>20</sub>H<sub>26</sub>B<sub>10</sub>N (M+H)<sup>+</sup> *m/z* 390.2990, found *m/z* 390.2990.

**2B.** Decaborane (632 mg, 5.18 mmol) was dissolved in CH<sub>3</sub>CN (2.3 mL) at room temperature under Ar atmosphere. The mixture was stirred for 2 h at 50 °C, and then, dry toluene (22.5 mL), AgNO<sub>3</sub> (30.6 mg, 0.180 mmol) and the ethynyl compound<sup>1</sup> (606 mg, 2.25 mmol) were added. The mixture was refluxed for 7 d. After cooling to room temperature, the solvent was evaporated, and the residue was subjected to silica gel column chromatography with hexane/CH<sub>2</sub>Cl<sub>2</sub> (v/v = 4/1) as an eluent. Recrystallization from chloroform and methanol (good and poor solvent, respectively) to give **2B** as a yellow solid (0.0869 g, 10%). <sup>1</sup>H NMR (400 MHz, CD<sub>2</sub>Cl<sub>2</sub>): δ (ppm) 7.30–7.38 (m, 6H, Ar-H), 7.17 (t, 1H, J = 7.4 Hz, Ar-H), 7.08 (d, 2H, J = 7.3 Hz, Ar-H), 6.96 (d, 4H, J = 9.0 Hz, Ar-H), 4.00 (s, 2H, carborane\_C-H), 3.2–1.6 (br, 20H, B-H). <sup>13</sup>C NMR (100 MHz, CD<sub>2</sub>Cl<sub>2</sub>): δ (ppm) 149.0, 146.5, 130.2, 129.3, 127.6, 126.6, 125.6, 123.2, 77.4, 61.5. <sup>11</sup>B NMR (128 MHz, CD<sub>2</sub>Cl<sub>2</sub>): δ (ppm) -1.7, -2.8, -4.9, -8.6, -10.0, -10.7, -11.4, -12.1, -13.4. HRMS(APCI<sup>+</sup>) C<sub>22</sub>H<sub>36</sub>B<sub>20</sub>N<sub>1</sub> [M+H]<sup>+</sup>: calcd. 534.4773, found 534.4758.

**3B.** Decaborane (527 mg, 4.31 mmol) was dissolved in CH<sub>3</sub>CN (2.5 mL) at room temperature under Ar atmosphere. The mixture was stirred for 2 h at 50 °C, and then, dry toluene (31.3 mL), AgNO<sub>3</sub> (34.0 mg, 0.200 mmol) and the ethynyl compound<sup>1</sup> (397 mg, 1.25 mmol) were added. The mixture was refluxed for 7 d. After cooling to room temperature, the solvent was evaporated, and the residue was subjected to silica gel column chromatography with hexane/CH<sub>2</sub>Cl<sub>2</sub> (v/v = 4/1) as an eluent. Recrystallization from chloroform and methanol (good and poor solvent, respectively) to give **3B** as a yellow solid (44.4 mg, 5%). <sup>1</sup>H NMR (400 MHz, CDCl<sub>3</sub>): δ (ppm) 7.38 (d, 6H, J = 7.3 Hz, Ar-H), 6.96 (d, 6H, J = 7.6 Hz, Ar-H), 3.89 (s, 3H, carborane\_C-H), 3.6–1.6 (br, 30H, B-H). <sup>13</sup>C NMR (100 MHz, CDCl<sub>3</sub>): δ (ppm) 147.7, 129.2, 128.7, 124.0, 77.1, 60.6. <sup>11</sup>B NMR (128 MHz, CDCl<sub>3</sub>): δ (ppm) -1.3, -2.4, -4.6, -8.4, -9.6, -10.1, -11.3, -12.0. HRMS(APCI<sup>-</sup>) C<sub>24</sub>H<sub>45</sub>B<sub>30</sub>N<sub>1</sub>Cl<sub>1</sub>[M+Cl]<sup>-</sup>: calcd. 712.6081, found 712.6067.

## References

1. Rajavelu, K.; Rajakumar, P.; Sudip, M.; Kothandaraman, R. *New J. Chem.* **2016**, *40*, 10246.

## Figures and Table

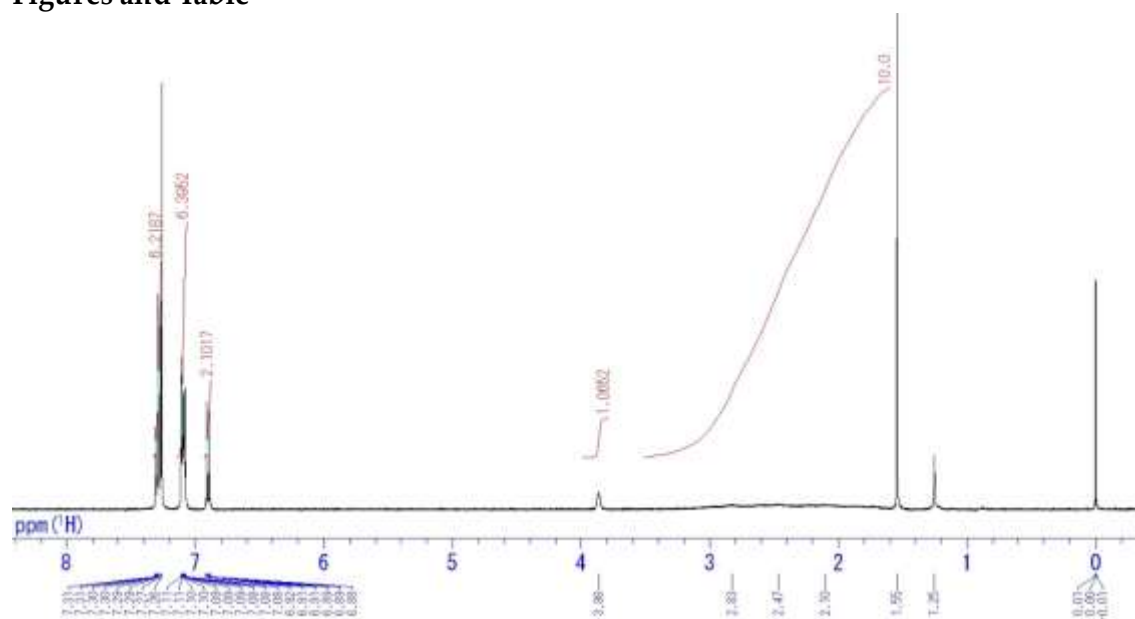

Chart S1. <sup>1</sup>H NMR spectrum of **1B** in CDCl<sub>3</sub> at room temperature.

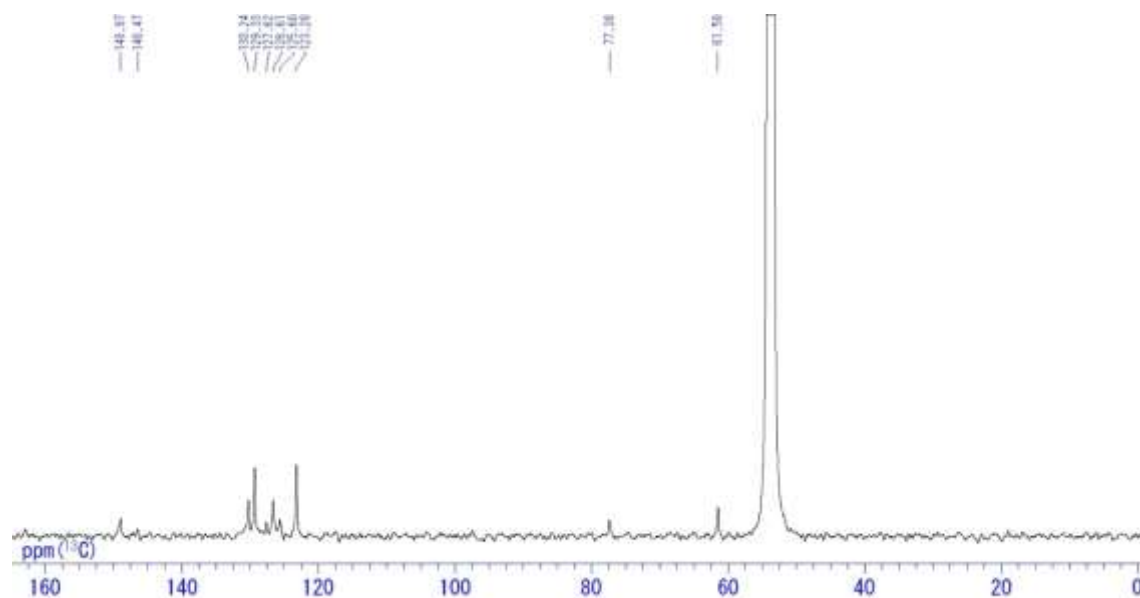

Chart S2. <sup>13</sup>C NMR spectrum of **1B** in CDCl<sub>3</sub> at room temperature.





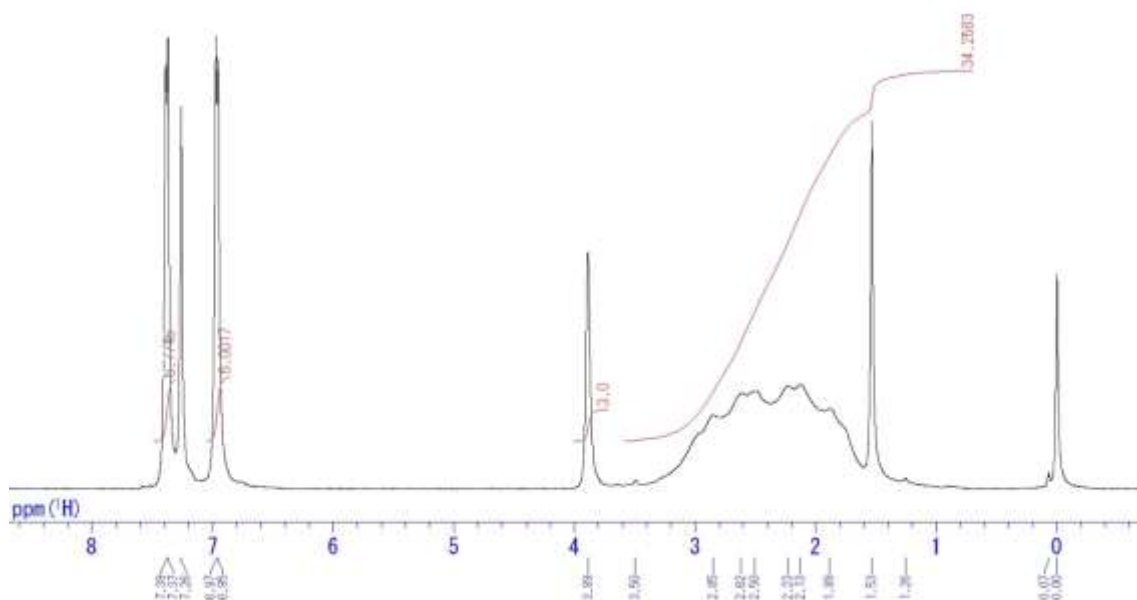

Chart S7.  $^1\text{H}$  NMR spectrum of **3B** in  $\text{CDCl}_3$  at room temperature.

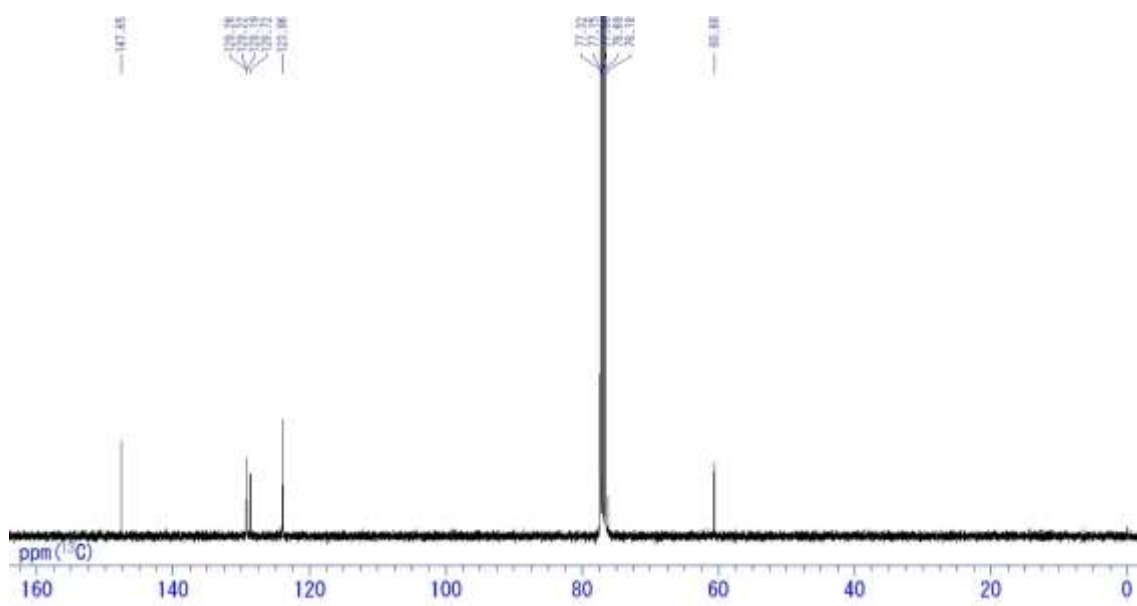

Chart S8.  $^{13}\text{C}$  NMR spectrum of **3B** in  $\text{CDCl}_3$  at room temperature.

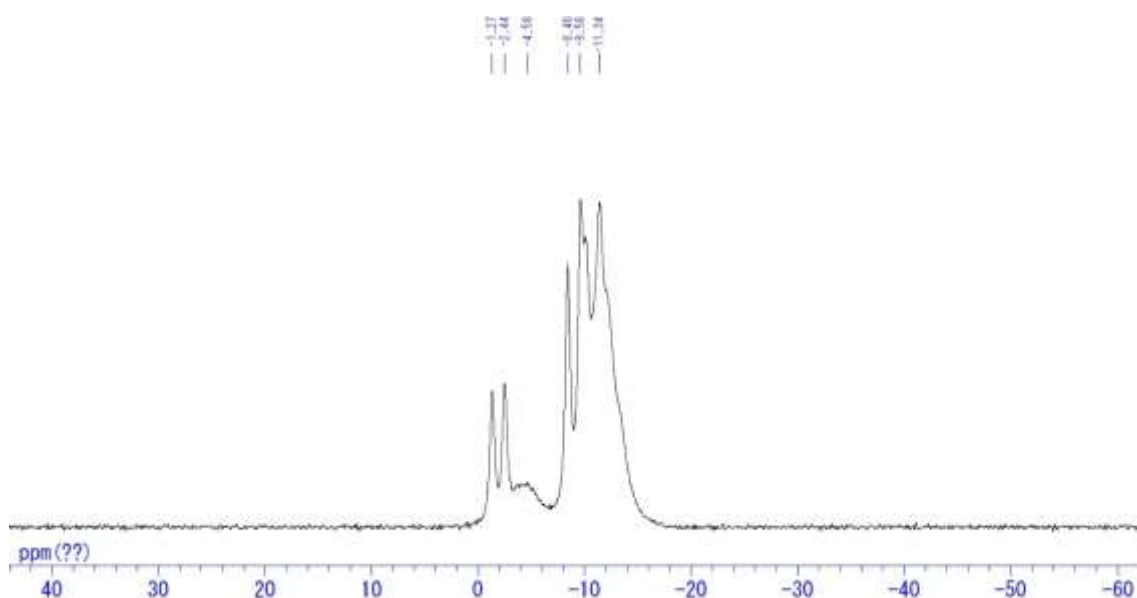

**Chart S9.**  $^{11}\text{B}$  NMR spectrum of **3B** in  $\text{CDCl}_3$  at room temperature.

**Table S1.** Optical properties of triphenylamine

| Parameter                                              | Value         |
|--------------------------------------------------------|---------------|
| $\lambda_{\text{abs}}(\text{nm})^a$                    | 300           |
| $\epsilon_{\text{max}}(\text{M}^{-1}\text{cm}^{-1})^a$ | 27,700        |
| $\lambda_{\text{em,rt}}(\text{nm})^b$                  | 358           |
| $\lambda_{\text{em,77K}}(\text{nm})^c$                 | 353, 406, 428 |

<sup>a</sup> $1.0 \times 10^{-5}$  M in THF at room temperature. <sup>b</sup> $1.0 \times 10^{-5}$  M in THF at room temperature with the excitation light at 300 nm. <sup>c</sup> $1.0 \times 10^{-5}$  M in MTHF at room temperature with the excitation light at 300 nm.

### Lippert–Mataga Plots

Lippert–Mataga plots were conducted with the following formula.<sup>3</sup>

$$\tilde{\nu}_{\text{abs}} - \tilde{\nu}_{\text{PL}} = \frac{2\Delta f}{4\pi\epsilon_0 hca^3} \Delta\mu^2 + \text{const.}$$

where  $\epsilon_0$  is the permittivity of vacuum  $h$  equals Planck's constant,  $c$  equals the velocity of light in a vacuum,  $a$  is the Onsager cavity radius,  $n$  and  $\epsilon$  are the refractive index and the dielectric constant of the solvent,  $\tilde{\nu}_{\text{abs}}$  and  $\tilde{\nu}_{\text{PL}}$  are the absorption and photoluminescence wavenumber,  $\Delta\mu$  is the difference in dipole moments during the transition, and  $\Delta f$  is the orientation polarizability defined as below, respectively.

$$\Delta f = \frac{\epsilon - 1}{2\epsilon + 1} - \frac{n^2 - 1}{2n^2 + 1}$$

Hence the slope derived from a plot of Stokes-shifts ( $\tilde{\nu}_{\text{abs}} - \tilde{\nu}_{\text{PL}}$ ) as a function of  $\Delta f$  can be expressed as

$$\text{slope} = \frac{2}{4\pi\epsilon_0 hca^3} \Delta\mu^2$$

**Table S2.** Optical properties of the triphenylamine derivatives in various solvents

|                                 | <b>1B</b>           |             | <b>2B</b>           |             | <b>3B</b>           |             |
|---------------------------------|---------------------|-------------|---------------------|-------------|---------------------|-------------|
|                                 | $\lambda_{em}$ (nm) | $\tau$ (ns) | $\lambda_{em}$ (nm) | $\tau$ (ns) | $\lambda_{em}$ (nm) | $\tau$ (ns) |
| Hexane                          | 380, 570            | 2.02, 4.81  | 381, 545            | 1.91, 4.06  | 383, 525            | 2.11, 3.77  |
| CHCl <sub>3</sub>               | 390                 | 1.63        | 385, 660            | 1.90, 3.88  | 384, 619            | 1.98, 4.66  |
| THF                             | 385, 450            | –           | 385                 | –           | 385, 680            | –           |
| CH <sub>2</sub> Cl <sub>2</sub> | 390                 | 2.32        | 386                 | 2.09        | 382, 670            | 2.09, 4.32  |
| MeCN                            | 390                 | 2.17        | 383                 | 2.10        | 391                 | 2.13        |

**Table S3.** Results of Lippert–Mataga plots<sup>a</sup>

| Compound  | Slope / cm <sup>-1</sup> | $\Delta\mu$ / Deby <sup>b</sup> |
|-----------|--------------------------|---------------------------------|
| <b>2B</b> | 10,328                   | 14.0                            |
| <b>3B</b> | 9,644                    | 13.5                            |

<sup>a</sup>Due to large ICT character of **1B**, the significant values were not detectable. <sup>b</sup>Effective radii of the Onsager cavity were estimated from the length between the nitrogen atom in the TPA moiety and the aryl-connected carbon atom in the *o*-carborane unit.

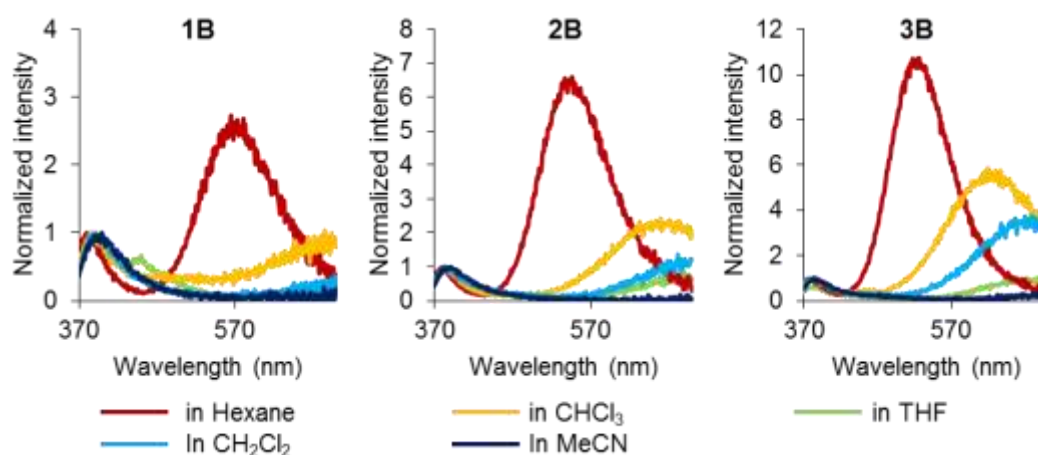**Figure S1.** Solvent dependent PL spectra of **1–3B**.



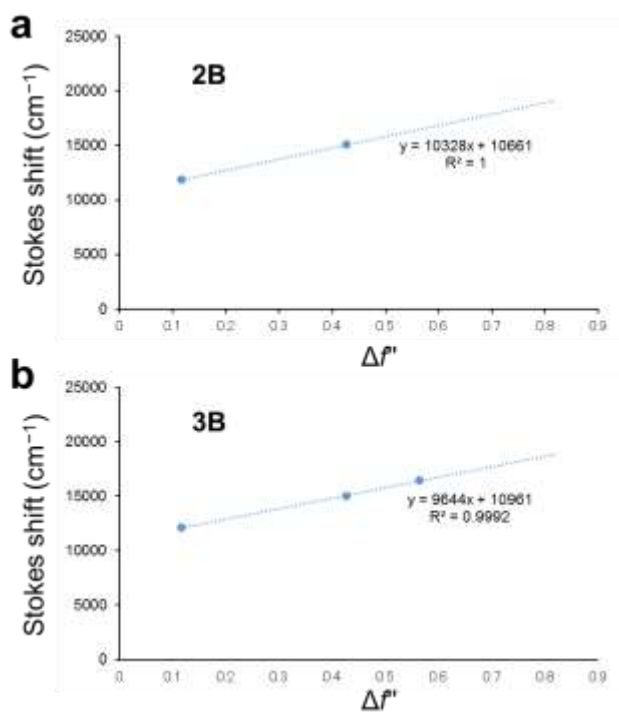

Figure S2. Lippert–Mataga plots with 2B and 3B.

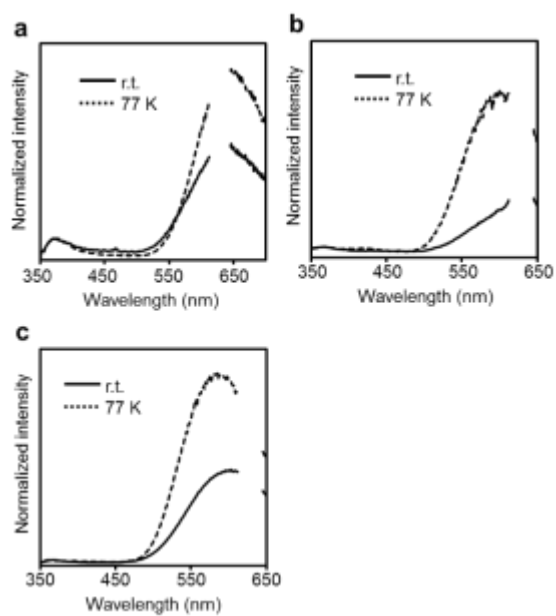

Figure S3. PL spectra of (a) 1B, (b) 2B and (c) 3B in the solid state at 77 K.

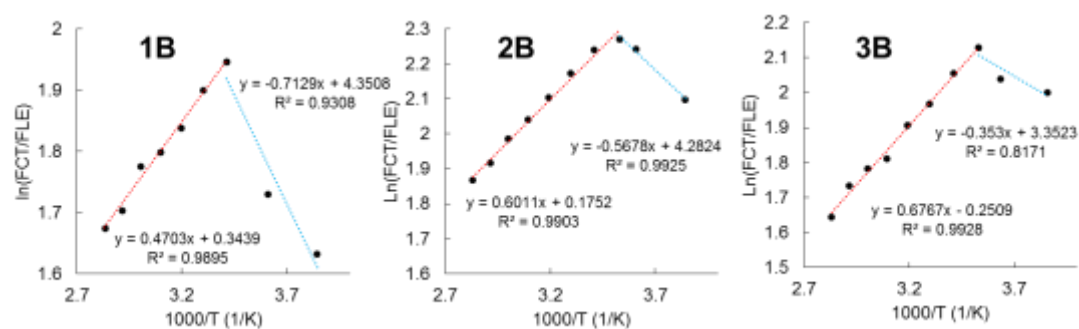

**Figure S4.** Stevens–Ban plots with 1–3B.

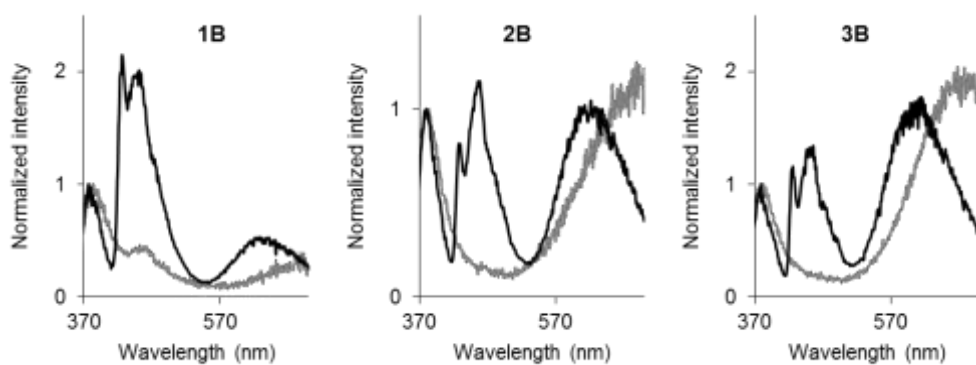

**Figure S5.** Normalized PL spectra of 1–3B in MTHF ( $1.0 \times 10^{-5}$  M) at r.t. (gray line) and 77 K (black line).

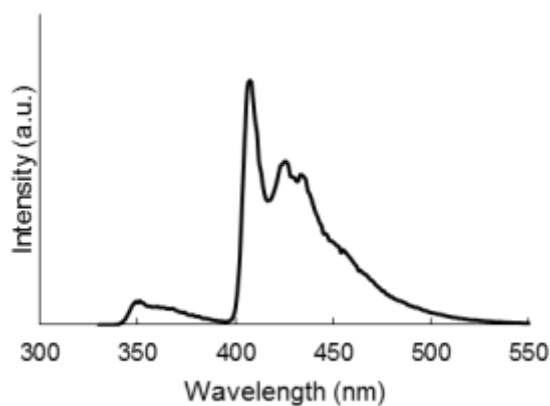

**Figure S6.** PL spectrum of triphenylamine in MTHF at 77 K.
